# Supplementary material for: A single molecule magnet to single molecule magnet transformation via a solvothermal process: Fe4Dy2 → Fe6Dy3
Source: Royal Society of Chemistry journal article supplement (doi:10.1039/c5dt03909f), 2015-11-04
Supplement: c5dt03909f1.pdf [file c5dt03909f1.pdf]

**Supporting Information for the manuscript:**

**A Single Molecule Magnet to Single Molecule Magnet  
Transformation via a Solvothermal Process:  $\text{Fe}_4\text{Dy}_2 \rightarrow$   
 $\text{Fe}_6\text{Dy}_3$**

*Sihuai Chen,<sup>a</sup> Valeriu Mereacre,<sup>a\*</sup> Christopher E. Anson<sup>a</sup> and Annie K. Powell<sup>a,b\*</sup>*

<sup>a</sup> Institute of Inorganic Chemistry, Karlsruhe Institute of Technology, Engesserstrasse 15, 76131 Karlsruhe, Germany.

<sup>b</sup> Institute of Nanotechnology, Karlsruhe Institute of Technology, Hermann-von-Helmholtz Platz 1, 76344 Eggenstein-Leopoldshafen, Germany.

**Table S1** Magnetic data of compounds **1-4** summarised from the dc measurements.

| Compound                                   | Ground state of Ln <sup>III</sup> | $\chi T$ expected for non-interacting ions per complex (cm <sup>3</sup> K mol <sup>-1</sup> ) | $\chi T$ measured at 300 K per complex (cm <sup>3</sup> K mol <sup>-1</sup> ) | $\chi T$ measured at 1.8 K per complex (cm <sup>3</sup> K mol <sup>-1</sup> ) |
|--------------------------------------------|-----------------------------------|-----------------------------------------------------------------------------------------------|-------------------------------------------------------------------------------|-------------------------------------------------------------------------------|
| Fe <sub>4</sub> Y <sub>2</sub> , <b>1</b>  |                                   | 17.5                                                                                          | 14.5                                                                          | 0.02                                                                          |
| Fe <sub>4</sub> Dy <sub>2</sub> , <b>2</b> | <sup>6</sup> H <sub>15/2</sub>    | 45.8                                                                                          | 42.3                                                                          | 32.6                                                                          |
| Fe <sub>6</sub> Y <sub>3</sub> , <b>3</b>  |                                   | 26.3                                                                                          | 12.0                                                                          | 0.75                                                                          |
| Fe <sub>6</sub> Dy <sub>3</sub> , <b>4</b> | <sup>6</sup> H <sub>15/2</sub>    | 68.8                                                                                          | 54.7                                                                          | 31.1                                                                          |

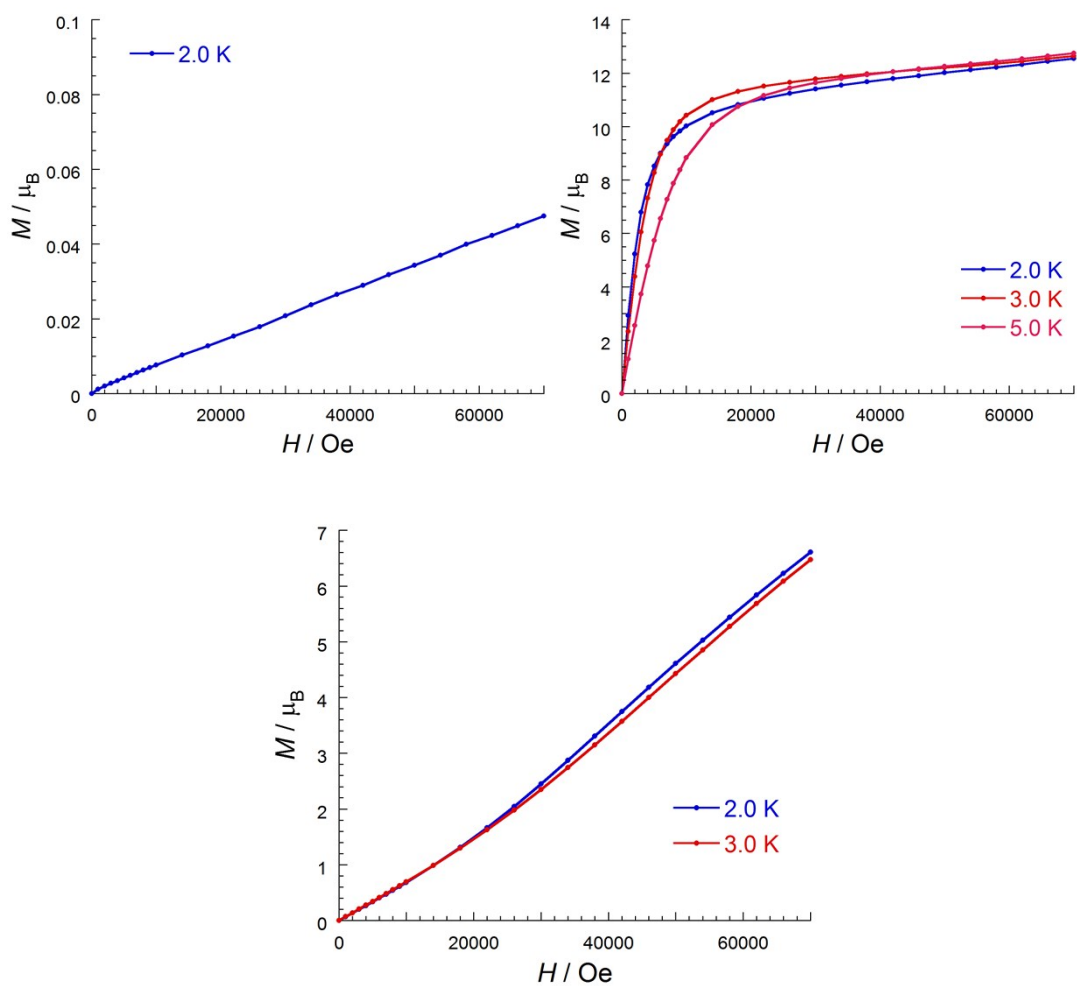

**Figure S1** Field dependence of magnetisation at low temperature for compound **1** (top-left), **2** (top-right) and **3** (bottom).

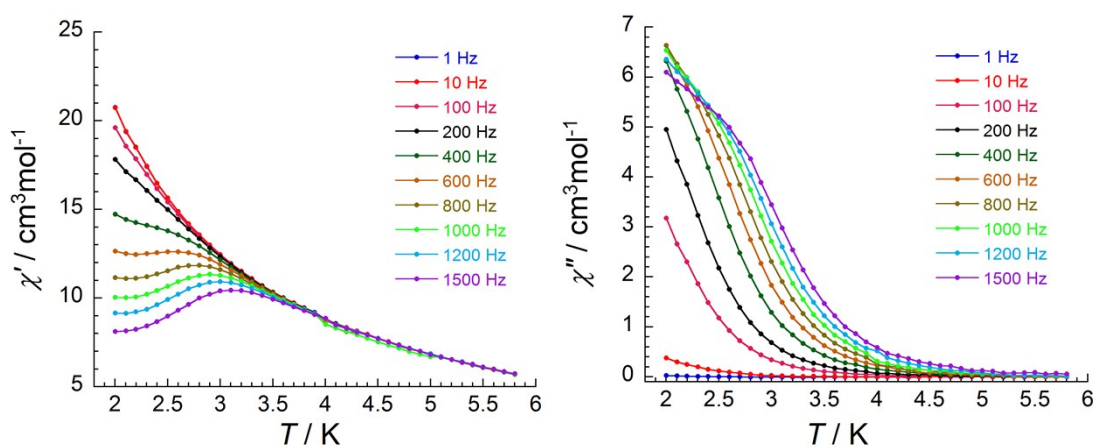

**Figure S2** Temperature dependence of the in-phase ( $\chi'$ ) (left) and out-of-phase ( $\chi''$ ) (right) ac susceptibility components at the indicated frequencies in zero dc field for **2**.

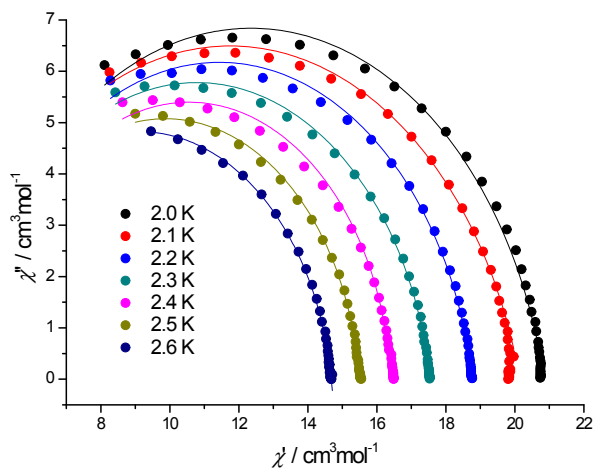

**Figure S3** Cole-Cole plots under zero dc field for compound **2**.

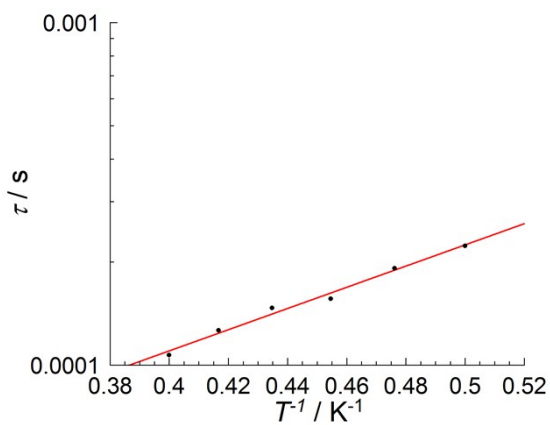

**Figure S4** Arrhenius plot using ac data under zero dc field for compound **2**.

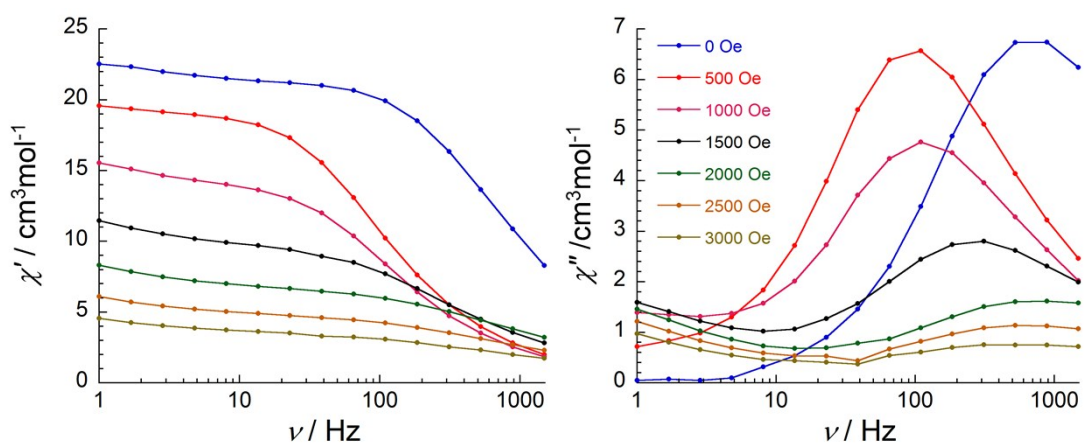

**Figure S5** Frequency dependence of the in-phase ( $\chi'$ ) (left) and out-of-phase ( $\chi''$ ) (right) ac susceptibility components under the indicated dc fields at 1.8 K for **2**.

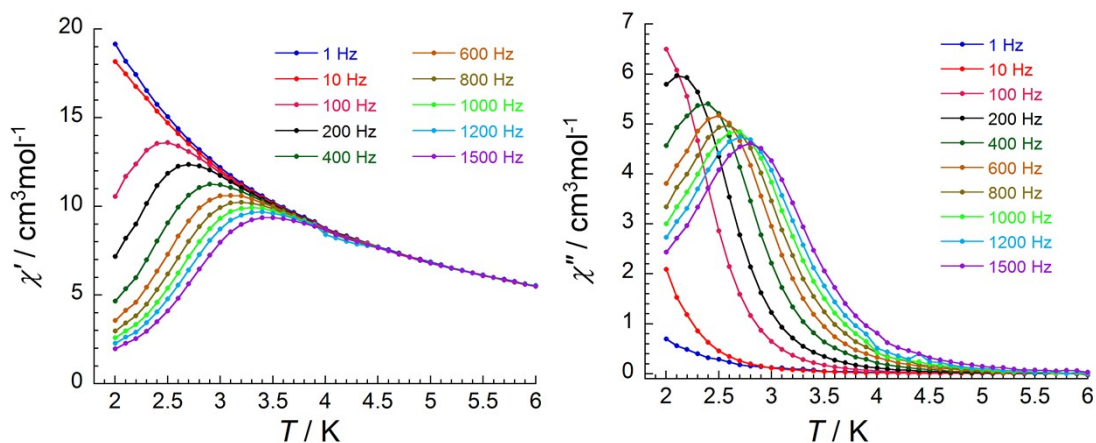

**Figure S6** Temperature dependence of the in-phase ( $\chi'$ ) (left) and out-of-phase ( $\chi''$ ) (right) ac susceptibility components at the indicated frequencies under 500 Oe dc field for **2**.

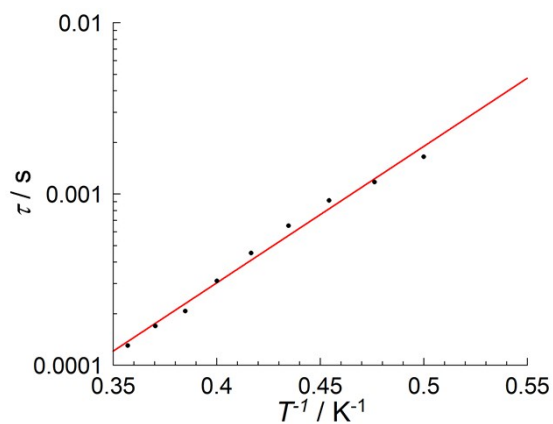

**Figure S7** Arrhenius plot using ac data under 500 Oe dc field for compound **2**.

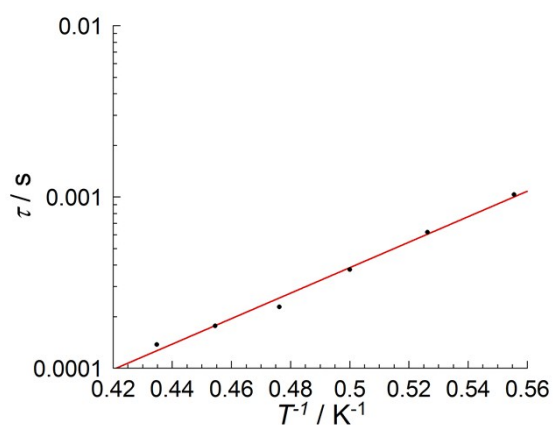

**Figure S8** Arrhenius plot using ac data under 1000 Oe dc field for compound **4**.
